# Supplementary material for: Facile fabrication of a SnS2/Ag3VO4 Z-scheme heterojunction for boosting visible-light photocatalytic activity
Source: Royal Society of Chemistry journal article supplement (doi:10.1039/d3ce00188a), 2023-01-01
Supplement: d3ce00188a1.pdf [file d3ce00188a1.pdf]

## Supporting Information

### **Facile Fabrication of SnS<sub>2</sub>/Ag<sub>3</sub>VO<sub>4</sub> Z-scheme heterojunction for boosting visible-light photocatalytic activity**

Qiang Li,<sup>a,b,\*</sup> Shiwu He,<sup>a</sup> Lijie Wang,<sup>a</sup> Jupu Song,<sup>a</sup> Jiapeng Wang,<sup>a</sup> Chunfeng Shao,<sup>a</sup>  
Zhenfei Tian<sup>a</sup> and Yi Liu<sup>a,b,\*</sup>

*<sup>a</sup>Anhui Province Key Laboratory of Pollutant Sensitive Materials and Environmental Remediation,  
College of Physics and Electronic Information, Huaibei Normal University, Huaibei, 235000, PR  
China*

*<sup>b</sup>Anhui Province Industrial Generic Technology Research Center for Alumics Materials, Huaibei  
Normal University, Huaibei, Anhui 235000, PR China*

\*Corresponding authors.

E-mail address: qiangli@chnu.edu.cn (Q. Li) and yiliu@chnu.edu.cn (Y. Liu)

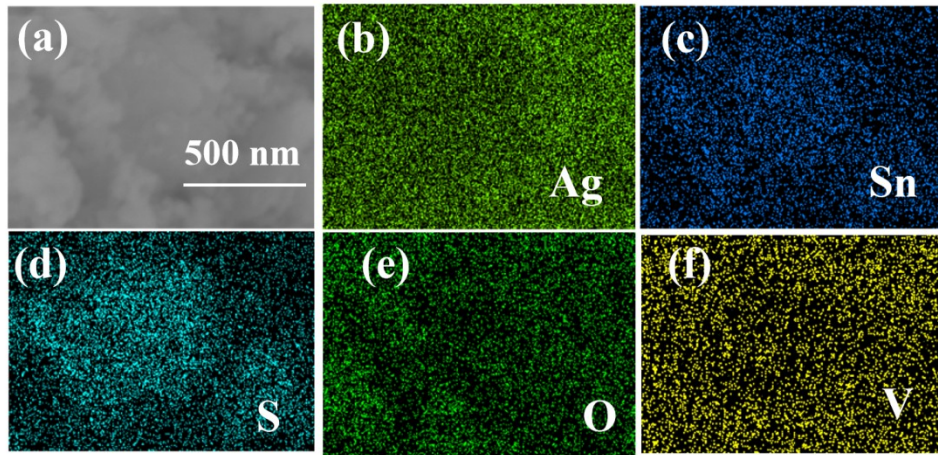

**Fig. S1.** The SEM image (a) and corresponding elemental distributions of 5wt% SnS<sub>2</sub>/Ag<sub>3</sub>VO<sub>4</sub> composite: (b) Ag, (c) Sn, (d) S, (e) O and (f) V.

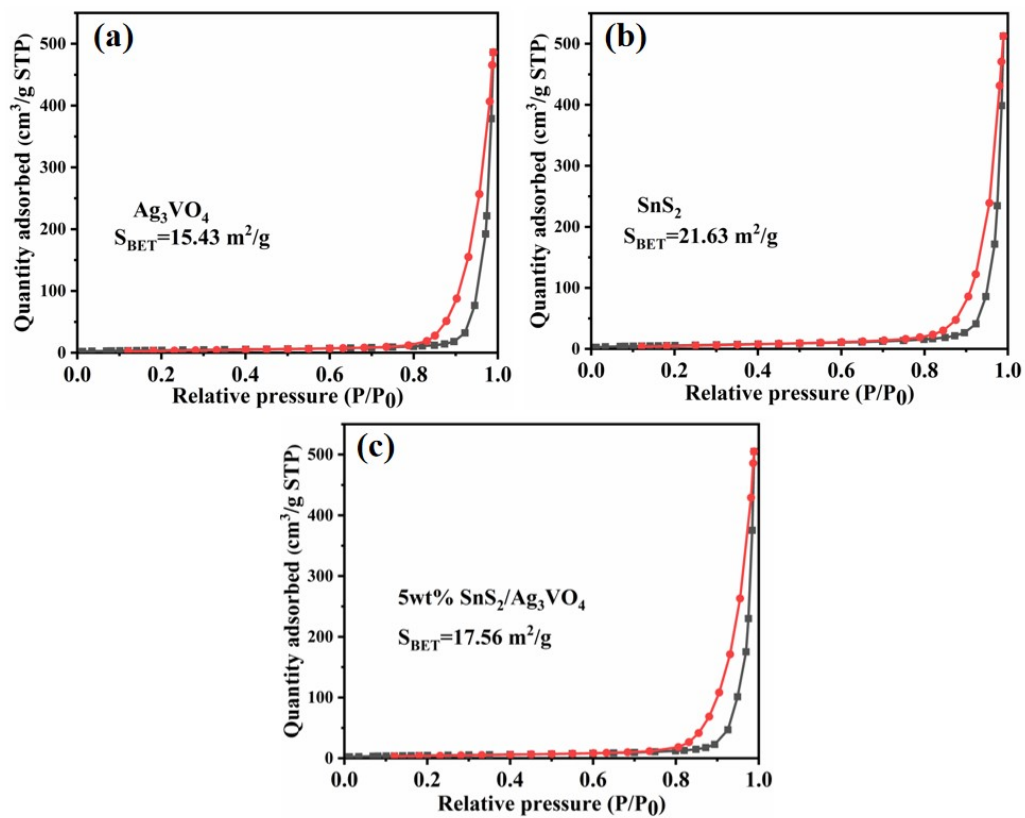

**Fig. S2.** Nitrogen adsorption-desorption isotherms of (a) Ag<sub>3</sub>VO<sub>4</sub>, (b) SnS<sub>2</sub>, and (c) 5wt% SnS<sub>2</sub>/Ag<sub>3</sub>VO<sub>4</sub> composite.

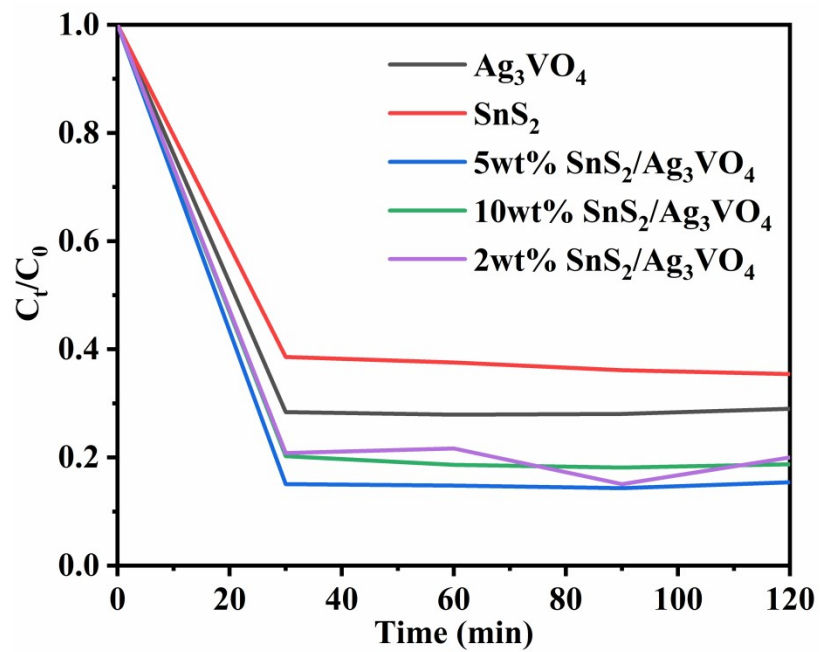

**Fig. S3.** Absorption ability evaluation of various catalysts for MB in dark condition.
